# Supplementary material
Source: PubMed Central journal article supplement (PMC1952226)
Supplement: 7601811s2.pdf [file 7601811s2.pdf]

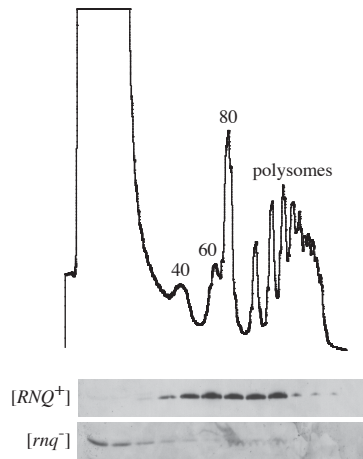

Supplementary Figure 2: Wild-type [*RNQ*<sup>+</sup>] and [*rnq*<sup>-</sup>] cells were resuspended in CSB buffer and glass beads and lysed by vortexing at 4°C. Precleared lysates (~80 OD<sub>260</sub>) were layered onto 4 ml 10-50% sucrose gradients and ultracentrifuged at 55,000 rpm (SW55Ti) for 80 min. RNA was monitored by OD<sub>260</sub> and gradients were separated by a polysome fractionation machine, and 400μl fractions were collected. 50μl of each fraction were resolved by SDS-PAGE and immunoblotting with Rnq1 specific antibodies.

Top: OD<sub>260</sub> profile of wild-type [*RNQ*<sup>+</sup>] strain. 40 (40S ribosomal subunits), 60 (60S ribosomal subunits), 80, (80S ribosomes). Bottom: Rnq1 immunoblots of gradient fractions corresponding to migration of ribosomes through the gradient described above.
