# Supplementary material
Source: PubMed Central journal article supplement (PMC1952226)
Supplement: 7601811s3.pdf [file 7601811s3.pdf]

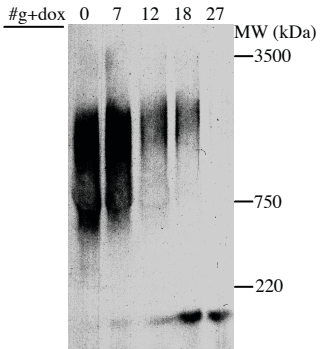

Supplementary Figure 3: *hsp104-Δ[TET:HSP104] [RNQ<sup>+</sup>]* strain was subcultured in log phase in the presence of 10  $\mu\text{g/ml}$  of doxycycline (dox) in liquid media at 30°C. Cells were harvested after indicated number of generations (#g), resuspended in PEB and lysed by vortexing with glass beads at 4°C. Lysate was precleared at 600g for 2 min. 80  $\mu\text{g}$  of the lysate was subjected to SDD-AGE and immunoblotting using Rnq1 specific antibodies. Numbers on the right indicates estimated molecular weights (MW) of major Rat Soleus proteins (Titin ~3500 kDa, Nebulin ~750 kDa, and Myosin ~220 kDa).
